# Supplementary material for: High-resolution interpolar difference of atmospheric methane around the Last Glacial Maximum
Source: Copernicus journal article supplement (doi:10.5194/bg-9-3961-2012), 2012-10-16
Supplement: Supplementary file 1 [file edml_ch4data_32-11kyrBP.xls]

## Sheet: Readme
EPICA Dronning Maud Land Ice Core CH4 Data 32-11KYrBP
-----------------------------------------------------------------------
NOTE: PLEASE CITE ORIGINAL REFERENCE WHEN USING THIS DATA!!!!!
NAME OF DATA SET: EPICA Dronning Maud Land Ice Core CH4 Data 32-11KYrBP
LAST UPDATE: 10/2012
CONTRIBUTORS: Baumgartner, M., A. Schilt, O. Eicher, J. Schmitt,
J. Schwander, R. Spahni, H. Fischer and T.F. Stocker.
ORIGINAL REFERENCE:
Baumgartner, M., A. Schilt, O. Eicher, J. Schmitt,
J. Schwander, R. Spahni, H. Fischer and T.F. Stocker. 2012.
High-resolution interpolar difference of atmospheric methane around the Last Glacial Maximum.
Biogeosciences, Vol. 9, pp. 3961–3977.
doi:10.5194/bg-9-3961-2012
ADDITIONAL REFERENCE:
EPICA Community Members. 2006.
One-to-one coupling of glacial climate variability
in Greenland and Antarctica.
Nature 444, 195-198.
GEOGRAPHIC REGION: Antarctica
PERIOD OF RECORD: 32 - 11KYrBP
FUNDING SOURCES:
This work is a contribution to the European Project for Ice Coring
in Antarctica (EPICA), a joint ESF (European Science Foundation)/
European Commission (EC) scientific program, funded by the EC and by
national contributions from Belgium, Denmark, France, Germany, Italy,
the Netherlands, Norway, Sweden, Switzerland, and the United Kingdom.
We acknowledge financial support by the Swiss National Science Foundation
and the University of Bern. This is EPICA publication number 290.
DESCRIPTION:
CH4 record from the EPICA Dronning Maud Land ice core, Antarctica,
75°00'S, 00°04'E, covering 32-11KYrBP.

## Sheet: EDML CH4
EDML CH4 DATA:
Column 1: EDML depth (m)
Column 2: Gas age (unified EDML gas age scale Lemieux-Dudon et al., (2010))
Column 3: CH4 concentration (parts per billion by volume, ppbv)
Column 4: 1-sigma uncertainty CH4 concentration (parts per billion by volume, ppbv)
Column 5: Published in
1	2	3	4	5
depth	age	ch4	error	published in
(m)	(years BP)	(ppbv)	(ppbv)
692.165	11067.3	716.8	10	EPICA Community Members (2006)
692.675	11079.2	672.7	10	EPICA Community Members (2006)
695.165	11138.3	688.2	10	EPICA Community Members (2006)
700.015	11253.6	698	10	EPICA Community Members (2006)
700.045	11254.3	715.8	7.3	Baumgartner et al., (2012)
700.165	11257.1	710.7	10	EPICA Community Members (2006)
703.165	11325.1	674.6	10	EPICA Community Members (2006)
703.585	11334.1	661.2	10	EPICA Community Members (2006)
708.165	11430.2	680.7	10	EPICA Community Members (2006)
711.015	11487.6	714.7	10	EPICA Community Members (2006)
711.165	11490.4	728.4	10	EPICA Community Members (2006)
711.685	11500.3	708.2	6.2	Baumgartner et al., (2012)
716.165	11583.1	590.3	10	EPICA Community Members (2006)
716.615	11591.9	622.5	10	EPICA Community Members (2006)
719.165	11631.4	502.3	10	EPICA Community Members (2006)
724.015	11707.3	474.7	10	EPICA Community Members (2006)
724.165	11709.2	483.9	10	EPICA Community Members (2006)
724.685	11716	482.9	6.2	Baumgartner et al., (2012)
728.165	11757.6	470.4	10	EPICA Community Members (2006)
728.675	11764.8	473.1	10	EPICA Community Members (2006)
730.165	11789.2	482.1	10	EPICA Community Members (2006)
735.015	11876.5	477.7	10	EPICA Community Members (2006)
735.165	11879.1	533.1	10	EPICA Community Members (2006)
735.535	11885.3	486.5	6.2	Baumgartner et al., (2012)
738.165	11934.4	488.5	10	EPICA Community Members (2006)
738.67	11944.4	470.2	10	EPICA Community Members (2006)
742.165	12009.4	468.4	10	EPICA Community Members (2006)
747.015	12124.4	464.3	10	EPICA Community Members (2006)
747.165	12128.1	476.2	10	EPICA Community Members (2006)
750.675	12215.8	466.9	10	EPICA Community Members (2006)
751.165	12229.2	499.5	10	EPICA Community Members (2006)
756.275	12372.8	487.5	10	EPICA Community Members (2006)
759.015	12445.1	474	10	EPICA Community Members (2006)
759.045	12445.9	468.7	10	EPICA Community Members (2006)
759.075	12446.8	482.7	10	EPICA Community Members (2006)
759.105	12447.6	479	6.2	Baumgartner et al., (2012)
759.165	12449.3	458.2	10	EPICA Community Members (2006)
762.505	12549.6	474.3	10	EPICA Community Members (2006)
762.675	12554.8	484.2	10	EPICA Community Members (2006)
767.165	12678.3	581.8	10	EPICA Community Members (2006)
772.015	12835.4	672.7	10	EPICA Community Members (2006)
772.395	12847.4	674.2	10	EPICA Community Members (2006)
772.685	12856.5	668.1	6.2	Baumgartner et al., (2012)
774.165	12902.5	633.4	10	EPICA Community Members (2006)
775.555	12942.9	632.1	10	EPICA Community Members (2006)
780.165	13070.8	647.1	10	EPICA Community Members (2006)
783.015	13155.1	645	10	EPICA Community Members (2006)
783.045	13156	653.2	6.2	Baumgartner et al., (2012)
783.165	13159.5	654.4	10	EPICA Community Members (2006)
787.395	13277.3	659.5	10	EPICA Community Members (2006)
787.675	13285.7	661.6	10	EPICA Community Members (2006)
791.505	13396.5	641.4	10	EPICA Community Members (2006)
796.015	13517.9	644	10	EPICA Community Members (2006)
796.165	13522.7	626.9	10	EPICA Community Members (2006)
799.275	13622.8	626.7	10	EPICA Community Members (2006)
799.625	13633.3	648	10	EPICA Community Members (2006)
803.165	13734.9	612	10	EPICA Community Members (2006)
809.015	13916.4	622.7	10	EPICA Community Members (2006)
809.165	13920.8	606.9	10	EPICA Community Members (2006)
809.655	13935.6	616.1	6.2	Baumgartner et al., (2012)
812.275	14017.6	602.9	10	EPICA Community Members (2006)
812.615	14028.7	611	10	EPICA Community Members (2006)
815.165	14113.2	601.3	10	EPICA Community Members (2006)
819.015	14229	646.7	10	EPICA Community Members (2006)
819.395	14241.4	601.5	10	EPICA Community Members (2006)
819.415	14242	618	6.2	Baumgartner et al., (2012)
823.165	14352.2	594.2	10	EPICA Community Members (2006)
823.675	14366.9	609.8	10	EPICA Community Members (2006)
827.275	14471.8	552.5	10	EPICA Community Members (2006)
832.015	14605	521	10	EPICA Community Members (2006)
832.045	14605.9	496.3	10	EPICA Community Members (2006)
832.395	14615.9	484.9	10	EPICA Community Members (2006)
835.165	14690.4	471	10	EPICA Community Members (2006)
835.675	14704.7	468.5	10	EPICA Community Members (2006)
839.165	14789.8	454.2	10	EPICA Community Members (2006)
843.015	14887.8	487.3	10	EPICA Community Members (2006)
843.615	14902.8	472.5	6.2	Baumgartner et al., (2012)
844.165	14916.4	468.2	10	EPICA Community Members (2006)
848.165	15021.7	460.1	10	EPICA Community Members (2006)
848.675	15035.1	468.8	10	EPICA Community Members (2006)
851.395	15099.7	475.8	10	EPICA Community Members (2006)
854.015	15172.6	470.3	10	EPICA Community Members (2006)
854.165	15176.2	465.2	10	EPICA Community Members (2006)
854.615	15186.8	474.8	6.2	Baumgartner et al., (2012)
859.165	15304.5	455.9	10	EPICA Community Members (2006)
859.675	15317.3	466.6	10	EPICA Community Members (2006)
863.165	15408.3	446.8	10	EPICA Community Members (2006)
867.015	15509.4	440.7	10	EPICA Community Members (2006)
867.045	15510.2	452.3	10	EPICA Community Members (2006)
867.615	15525.9	441.5	6.2	Baumgartner et al., (2012)
872.675	15664.3	446.7	10	EPICA Community Members (2006)
876.165	15761.4	437.1	10	EPICA Community Members (2006)
878.015	15809.5	455	10	EPICA Community Members (2006)
884.675	15998.8	449.4	10	EPICA Community Members (2006)
887.165	16065.3	435.3	10	EPICA Community Members (2006)
891.015	16175.9	426.7	10	EPICA Community Members (2006)
891.045	16176.7	439	10	EPICA Community Members (2006)
896.675	16339.9	421.4	10	EPICA Community Members (2006)
899.395	16414.8	408.3	10	EPICA Community Members (2006)
903.615	16545.9	427.8	6.2	Baumgartner et al., (2012)
908.625	16695.8	439.4	10	EPICA Community Members (2006)
912.395	16802.9	398.5	10	EPICA Community Members (2006)
915.015	16890	402	10	EPICA Community Members (2006)
915.615	16911.8	399.5	6.2	Baumgartner et al., (2012)
918.675	17011.3	418.3	10	EPICA Community Members (2006)
924.165	17229.6	390	10	EPICA Community Members (2006)
928.675	17417.2	389.9	10	EPICA Community Members (2006)
931.675	17539.3	385.7	10	EPICA Community Members (2006)
933.165	17599.6	378.6	10	EPICA Community Members (2006)
938.085	17783.7	389.2	6.2	Baumgartner et al., (2012)
938.625	17802.7	387.7	7.7	Baumgartner et al., (2012)
938.655	17803.6	375.4	6.2	Baumgartner et al., (2012)
938.685	17804.6	387.3	10	EPICA Community Members (2006)
943.675	17997.2	376.8	10	EPICA Community Members (2006)
946.325	18104.6	376.8	10	EPICA Community Members (2006)
946.615	18118.1	370.9	10	EPICA Community Members (2006)
951.045	18327	376.1	6.2	Baumgartner et al., (2012)
951.615	18355.2	375	6.2	Baumgartner et al., (2012)
957.675	18632.3	364	10	EPICA Community Members (2006)
960.165	18736.7	375.8	10	EPICA Community Members (2006)
962.015	18814	372.7	10	EPICA Community Members (2006)
962.165	18820.5	393.3	6.2	Baumgartner et al., (2012)
962.195	18821.7	382.2	6.2	Baumgartner et al., (2012)
962.615	18840.5	372.1	6.2	Baumgartner et al., (2012)
967.675	19098	365.5	10	EPICA Community Members (2006)
972.165	19325.8	368	10	EPICA Community Members (2006)
975.015	19471.9	374	10	EPICA Community Members (2006)
975.045	19473.6	378	10	EPICA Community Members (2006)
975.555	19501.8	376.4	6.2	Baumgartner et al., (2012)
975.585	19503.4	366.7	6.2	Baumgartner et al., (2012)
978.675	19656.9	369.8	10	EPICA Community Members (2006)
983.165	19865.5	368.7	10	EPICA Community Members (2006)
987.015	20039.2	366.3	10	EPICA Community Members (2006)
987.495	20062.9	375	6.2	Baumgartner et al., (2012)
987.525	20064.4	369.3	6.2	Baumgartner et al., (2012)
987.555	20065.8	371.3	6.2	Baumgartner et al., (2012)
987.585	20067.3	368.7	6.2	Baumgartner et al., (2012)
987.615	20068.8	366.7	7.5	Baumgartner et al., (2012)
991.675	20251.6	361.7	10	EPICA Community Members (2006)
995.165	20414.4	359.1	10	EPICA Community Members (2006)
1000.01	20649.4	367	10	EPICA Community Members (2006)
1000.04	20650.6	368.5	6.2	Baumgartner et al., (2012)
1001.99	20729.7	375.1	6.2	Baumgartner et al., (2012)
1003.67	20798.9	383.1	10	EPICA Community Members (2006)
1005.01	20852.4	381.7	6.2	Baumgartner et al., (2012)
1005.91	20888.9	387.4	6.2	Baumgartner et al., (2012)
1007.01	20929.1	373.3	6.2	Baumgartner et al., (2012)
1008.18	20975.5	366.7	10	EPICA Community Members (2006)
1009.91	21049	365.6	6.2	Baumgartner et al., (2012)
1011.01	21097.3	375.7	10	EPICA Community Members (2006)
1011.04	21098.7	364	6.2	Baumgartner et al., (2012)
1012.91	21174.6	377	6.2	Baumgartner et al., (2012)
1012.95	21175.7	371.3	6.2	Baumgartner et al., (2012)
1014.01	21216.9	354.2	6.2	Baumgartner et al., (2012)
1014.04	21218.1	358.2	6.2	Baumgartner et al., (2012)
1015.67	21287.5	365.9	10	EPICA Community Members (2006)
1017.01	21343.8	365.6	6.2	Baumgartner et al., (2012)
1017.04	21344.9	359	6.2	Baumgartner et al., (2012)
1018.16	21387.9	357.4	10	EPICA Community Members (2006)
1019.91	21451.7	356.8	6.2	Baumgartner et al., (2012)
1021.91	21525.1	358.4	7.3	Baumgartner et al., (2012)
1023.01	21567.5	361.3	10	EPICA Community Members (2006)
1023.04	21568.7	365.1	6.2	Baumgartner et al., (2012)
1023.08	21569.8	361.8	6.2	Baumgartner et al., (2012)
1023.11	21571	361.2	6.2	Baumgartner et al., (2012)
1023.13	21572.2	378.7	6.2	Baumgartner et al., (2012)
1023.16	21573.3	353.9	6.2	Baumgartner et al., (2012)
1025.05	21640.8	370	6.2	Baumgartner et al., (2012)
1027.05	21712.5	361.2	6.2	Baumgartner et al., (2012)
1028.67	21773.6	361.8	10	EPICA Community Members (2006)
1029.91	21826.4	379.1	6.2	Baumgartner et al., (2012)
1029.94	21827.7	364.6	6.2	Baumgartner et al., (2012)
1031.16	21872.5	362.6	10	EPICA Community Members (2006)
1033.02	21935.5	371.5	6.2	Baumgartner et al., (2012)
1035.02	22019.7	381.7	10	EPICA Community Members (2006)
1035.05	22021.1	372.6	6.2	Baumgartner et al., (2012)
1037.08	22112.4	395	6.2	Baumgartner et al., (2012)
1038.02	22151	389.6	6.2	Baumgartner et al., (2012)
1039.67	22221.3	381.6	10	EPICA Community Members (2006)
1040.91	22275.8	381.8	6.2	Baumgartner et al., (2012)
1041.91	22314	391.4	6.2	Baumgartner et al., (2012)
1043.16	22360.5	393.9	10	EPICA Community Members (2006)
1045.02	22434.1	388.7	6.2	Baumgartner et al., (2012)
1046.02	22470.7	387	10	EPICA Community Members (2006)
1046.05	22471.8	388.9	6.9	Baumgartner et al., (2012)
1047.02	22502.5	385.2	6.2	Baumgartner et al., (2012)
1048.02	22529.7	385.1	6.2	Baumgartner et al., (2012)
1049.02	22556.9	390.2	6.2	Baumgartner et al., (2012)
1050.02	22585.8	391.4	6.2	Baumgartner et al., (2012)
1052.91	22679.8	389	6.2	Baumgartner et al., (2012)
1054.98	22734.7	387.9	6.2	Baumgartner et al., (2012)
1055.16	22739.5	393.4	10	EPICA Community Members (2006)
1057.02	22797.8	379.5	6.2	Baumgartner et al., (2012)
1058.02	22828.8	391	10	EPICA Community Members (2006)
1058.05	22829.7	391.4	6.2	Baumgartner et al., (2012)
1058.08	22830.6	399.4	6.2	Baumgartner et al., (2012)
1058.11	22831.6	394.4	6.2	Baumgartner et al., (2012)
1058.13	22832.5	381.8	6.2	Baumgartner et al., (2012)
1059.91	22879.7	385.6	6.2	Baumgartner et al., (2012)
1062.02	22942.3	393.9	6.2	Baumgartner et al., (2012)
1063.09	22974.8	399.2	6.2	Baumgartner et al., (2012)
1063.91	23000.1	391.9	6.2	Baumgartner et al., (2012)
1064.67	23022.5	402.7	10	EPICA Community Members (2006)
1067.02	23096.8	393.4	6.2	Baumgartner et al., (2012)
1069.02	23163.1	370.5	6.2	Baumgartner et al., (2012)
1069.05	23164.2	385.8	6.2	Baumgartner et al., (2012)
1071.02	23236.2	382.7	10	EPICA Community Members (2006)
1071.05	23237.4	361.7	6.2	Baumgartner et al., (2012)
1073.02	23339.1	361	6.2	Baumgartner et al., (2012)
1073.05	23341	362.9	6.2	Baumgartner et al., (2012)
1075.02	23461.8	363.6	6.2	Baumgartner et al., (2012)
1075.05	23463.7	361.7	6.2	Baumgartner et al., (2012)
1076.67	23565.2	358.1	10	EPICA Community Members (2006)
1077.91	23644	359.1	6.2	Baumgartner et al., (2012)
1077.98	23648.4	362.7	6.2	Baumgartner et al., (2012)
1079.16	23719.8	365.5	10	EPICA Community Members (2006)
1081.02	23836.6	364.6	6.2	Baumgartner et al., (2012)
1081.05	23837.9	368.2	6.2	Baumgartner et al., (2012)
1083.02	23927.9	388	10	EPICA Community Members (2006)
1083.08	23930.7	362.4	6.2	Baumgartner et al., (2012)
1085.05	24043	362.8	6.2	Baumgartner et al., (2012)
1085.08	24044.9	373.4	6.2	Baumgartner et al., (2012)
1087.02	24156	373.1	6.2	Baumgartner et al., (2012)
1088.67	24245.5	348.7	10	EPICA Community Members (2006)
1089.91	24321.7	377.7	6.2	Baumgartner et al., (2012)
1091.16	24387.6	384.3	10	EPICA Community Members (2006)
1093.02	24489.4	373.6	7.6	Baumgartner et al., (2012)
1095.02	24615.1	379.7	10	EPICA Community Members (2006)
1095.08	24618.8	363	6.2	Baumgartner et al., (2012)
1095.11	24620.6	365.5	6.2	Baumgartner et al., (2012)
1095.13	24622.5	358.2	6.2	Baumgartner et al., (2012)
1095.16	24624.3	358.7	6.2	Baumgartner et al., (2012)
1097.02	24728.9	376	6.2	Baumgartner et al., (2012)
1099.02	24849.7	368.7	6.2	Baumgartner et al., (2012)
1100.67	24942	369.3	10	EPICA Community Members (2006)
1101.91	25007.8	386.5	6.2	Baumgartner et al., (2012)
1101.94	25009.4	366.2	6.2	Baumgartner et al., (2012)
1104.02	25119.9	371.2	6.2	Baumgartner et al., (2012)
1104.91	25171	364.4	6.2	Baumgartner et al., (2012)
1107.02	25286.5	369.3	10	EPICA Community Members (2006)
1107.05	25288.1	363.7	7.8	Baumgartner et al., (2012)
1109.02	25395.3	349	6.2	Baumgartner et al., (2012)
1109.05	25397	352.4	6.2	Baumgartner et al., (2012)
1110.67	25486.4	363.4	10	EPICA Community Members (2006)
1111.91	25555.9	359	6.4	Baumgartner et al., (2012)
1113.02	25616.4	371.3	6.2	Baumgartner et al., (2012)
1114.91	25713.5	359.4	6.2	Baumgartner et al., (2012)
1117.02	25815	374.6	6.2	Baumgartner et al., (2012)
1117.05	25816.6	355.3	6.2	Baumgartner et al., (2012)
1119.02	25918.8	362.3	10	EPICA Community Members (2006)
1119.05	25920.2	369.3	6.2	Baumgartner et al., (2012)
1119.08	25921.5	375.8	6.2	Baumgartner et al., (2012)
1119.11	25922.9	363	6.2	Baumgartner et al., (2012)
1119.13	25924.3	347.2	6.2	Baumgartner et al., (2012)
1119.16	25925.7	358	6.2	Baumgartner et al., (2012)
1121.02	26014	374	6.2	Baumgartner et al., (2012)
1121.05	26015.5	364	6.2	Baumgartner et al., (2012)
1122.67	26098.6	357.5	10	EPICA Community Members (2006)
1123.91	26159	359.4	6.2	Baumgartner et al., (2012)
1125.02	26213.5	366.2	6.2	Baumgartner et al., (2012)
1127.16	26322.5	362.2	10	EPICA Community Members (2006)
1129.02	26423.8	363	6.2	Baumgartner et al., (2012)
1130.02	26476.4	366	10	EPICA Community Members (2006)
1130.05	26478	379.2	6.2	Baumgartner et al., (2012)
1130.08	26479.5	366.2	6.2	Baumgartner et al., (2012)
1131.02	26530.7	372.3	6.2	Baumgartner et al., (2012)
1131.05	26532.4	373.5	6.2	Baumgartner et al., (2012)
1133.02	26638	379.9	6.2	Baumgartner et al., (2012)
1133.05	26639.6	381.1	6.2	Baumgartner et al., (2012)
1135.02	26748.7	370.4	6.2	Baumgartner et al., (2012)
1135.05	26750.1	374.2	6.4	Baumgartner et al., (2012)
1136.67	26827.1	375.5	10	EPICA Community Members (2006)
1137.91	26892.4	385.3	6.2	Baumgartner et al., (2012)
1139.16	26955.5	392.2	10	EPICA Community Members (2006)
1141.02	27028.2	385.4	6.2	Baumgartner et al., (2012)
1142.02	27068.5	388.3	10	EPICA Community Members (2006)
1142.05	27069.7	384.4	6.2	Baumgartner et al., (2012)
1142.08	27070.9	381.4	6.2	Baumgartner et al., (2012)
1142.11	27072.1	389.8	6.2	Baumgartner et al., (2012)
1142.13	27073.3	373.5	6.2	Baumgartner et al., (2012)
1142.16	27074.5	381.5	6.2	Baumgartner et al., (2012)
1143.02	27108.5	388.2	6.2	Baumgartner et al., (2012)
1145.02	27194.5	395.3	6.2	Baumgartner et al., (2012)
1146.67	27261.4	393.2	10	EPICA Community Members (2006)
1147.91	27310.1	392.2	6.2	Baumgartner et al., (2012)
1147.94	27311.3	404.1	6.2	Baumgartner et al., (2012)
1149.02	27357.6	447.3	6.2	Baumgartner et al., (2012)
1149.05	27359.2	407.7	6.2	Baumgartner et al., (2012)
1149.09	27360.9	417.9	6.2	Baumgartner et al., (2012)
1150.16	27418.4	429.1	10	EPICA Community Members (2006)
1151.91	27575.7	448.5	6.2	Baumgartner et al., (2012)
1151.94	27578.5	376.9	6.2	Baumgartner et al., (2012)
1151.98	27581.8	439.9	6.2	Baumgartner et al., (2012)
1153.05	27680.6	428.1	6.2	Baumgartner et al., (2012)
1153.09	27682.6	407.2	6.7	Baumgartner et al., (2012)
1155.02	27799	382.3	10	EPICA Community Members (2006)
1155.05	27801	384.1	6.2	Baumgartner et al., (2012)
1157.02	27935.2	371.8	6.2	Baumgartner et al., (2012)
1158.02	27998.2	375.4	6.2	Baumgartner et al., (2012)
1159.67	28090.9	362.5	10	EPICA Community Members (2006)
1160.91	28157.5	366	6.2	Baumgartner et al., (2012)
1162.16	28224.5	397.7	10	EPICA Community Members (2006)
1163.91	28306.6	389.6	6.2	Baumgartner et al., (2012)
1166.02	28402.8	400.8	6.2	Baumgartner et al., (2012)
1167.02	28453.6	416	10	EPICA Community Members (2006)
1167.05	28455.2	406.8	6.2	Baumgartner et al., (2012)
1167.08	28456.9	432.5	6.2	Baumgartner et al., (2012)
1167.11	28458.5	412	6.2	Baumgartner et al., (2012)
1167.13	28460.2	402.2	6.2	Baumgartner et al., (2012)
1167.16	28461.8	409	6.2	Baumgartner et al., (2012)
1169.02	28560.8	420.1	6.2	Baumgartner et al., (2012)
1170.02	28612.4	457.2	6.2	Baumgartner et al., (2012)
1170.05	28613.9	433.2	6.2	Baumgartner et al., (2012)
1171.67	28699.1	456.8	10	EPICA Community Members (2006)
1173.02	28774.2	453.6	6.2	Baumgartner et al., (2012)
1173.05	28776	472.2	6.2	Baumgartner et al., (2012)
1174.02	28832.7	458.6	6.2	Baumgartner et al., (2012)
1174.05	28834.1	458.4	6.2	Baumgartner et al., (2012)
1175.16	28887.5	387.7	10	EPICA Community Members (2006)
1177.02	28979.6	398.3	6.2	Baumgartner et al., (2012)
1178.02	29035.1	385.7	10	EPICA Community Members (2006)
1178.05	29036.8	425.9	6.2	Baumgartner et al., (2012)
1178.08	29038.4	390.7	6.2	Baumgartner et al., (2012)
1178.11	29040.1	393.2	6.2	Baumgartner et al., (2012)
1178.13	29041.8	383.9	6.2	Baumgartner et al., (2012)
1178.16	29043.4	383.5	6.2	Baumgartner et al., (2012)
1179.91	29129.4	397.5	6.2	Baumgartner et al., (2012)
1179.94	29130.8	385.2	6.2	Baumgartner et al., (2012)
1181.91	29239.8	373.9	6.2	Baumgartner et al., (2012)
1181.94	29241.2	385.5	6.2	Baumgartner et al., (2012)
1183.62	29326	387.9	10	EPICA Community Members (2006)
1185.02	29409.6	387.9	6.2	Baumgartner et al., (2012)
1187.16	29547	390.7	10	EPICA Community Members (2006)
1189.02	29651.9	396.9	6.2	Baumgartner et al., (2012)
1191.02	29770.9	387.7	10	EPICA Community Members (2006)
1191.05	29772.7	381.4	6.2	Baumgartner et al., (2012)
1191.08	29774.5	384.6	6.2	Baumgartner et al., (2012)
1193.05	29894.8	408.3	6.2	Baumgartner et al., (2012)
1193.05	29894.8	395.6	6.2	Baumgartner et al., (2012)
1194.02	29949.7	396.2	6.2	Baumgartner et al., (2012)
1194.05	29951.2	389	6.2	Baumgartner et al., (2012)
1194.08	29952.8	397.9	6.2	Baumgartner et al., (2012)
1195.62	30031.5	410.2	10	EPICA Community Members (2006)
1197.02	30105.1	405.3	6.2	Baumgartner et al., (2012)
1197.05	30106.9	400	6.2	Baumgartner et al., (2012)
1199.16	30219.9	388.4	10	EPICA Community Members (2006)
1203.02	30445.1	405.3	10	EPICA Community Members (2006)
1203.05	30447.1	414.5	6.2	Baumgartner et al., (2012)
1207.62	30771.1	393.8	10	EPICA Community Members (2006)
1212.16	31093	396.1	10	EPICA Community Members (2006)
1215.02	31287.3	404	10	EPICA Community Members (2006)
1215.05	31289.2	413.3	6.2	Baumgartner et al., (2012)
1218.62	31528.3	414.1	10	EPICA Community Members (2006)
1223.16	31839.4	424.1	10	EPICA Community Members (2006)
