# Supplementary material for: High-resolution interpolar difference of atmospheric methane around the Last Glacial Maximum
Source: Copernicus journal article supplement (doi:10.5194/bg-9-3961-2012), 2012-10-16
Supplement: Supplementary file 3 [file ngrip_ch4data_32-11kyrBP.xls]

## Sheet: Readme
NGRIP Ice Core CH4 Data 32-11KYrBP
-----------------------------------------------------------------------
NOTE: PLEASE CITE ORIGINAL REFERENCE WHEN USING THIS DATA!!!!!
NAME OF DATA SET: NGRIP Ice Core CH4 Data 32-11KYrBP
LAST UPDATE: 10/2012
CONTRIBUTORS: Baumgartner, M., A. Schilt, O. Eicher, J. Schmitt,
J. Schwander, R. Spahni, H. Fischer and T.F. Stocker.
ORIGINAL REFERENCE:
Baumgartner, M., A. Schilt, O. Eicher, J. Schmitt,
J. Schwander, R. Spahni, H. Fischer and T.F. Stocker. 2012.
High-resolution interpolar difference of atmospheric methane around the Last Glacial Maximum.
Biogeosciences, Vol. 9, pp. 3961–3977.
doi:10.5194/bg-9-3961-2012
ADDITIONAL REFERENCE:
Schilt, A., M. Baumgartner, J. Schwander, D. Buiron,
E. Capron, J. Chappellaz, L. Loulergue, S. Schüpbach,
R. Spahni, H. Fischer, and T.F. Stocker. 2010.
Atmospheric nitrous oxide during the last 140,000 years.
Earth and Planetary Science Letters, Vol. 300, pp. 33-43.
doi:10.1016/j.epsl.2010.09.027
GEOGRAPHIC REGION: Greenland
PERIOD OF RECORD: 32 - 11 KYrBP
FUNDING SOURCES:
This work is a contribution to the North Greenland Ice Sheet
Project (NGRIP), which is directed and organized by the
Department of Geophysics at the Niels Bohr Institute for
Astronomy, Physics and Geophysics, University of Copenhagen,
and it is supported by funding agencies in Denmark (SNF),
Belgium (FNRS-CFB), France (IPEV and INSU/CNRS), Germany (AWI),
Iceland (RANNIS), Japan (MEXT), Sweden (SPRS), Switzerland (SNF)
and the United States of America (NSF, Office of Polar Programs).
We acknowledge financial support by the Swiss NSF and the
University of Bern.
DESCRIPTION:
CH4 data from the North Greenland Ice Sheet Project (NGRIP)
ice core (75°06' N, 42°20' W) covering 32-11 KYrBP.

## Sheet: NGRIP CH4
NGRIP CH4 DATA:
Column 1: NGRIP depth (m)
Column 2: Gas age (CH4 synchronisation to unified EDML gas age scale Lemieux-Dudon et al., (2010))
Column 3: CH4 concentration (parts per billion by volume, ppbv)
Column 4: 1-sigma uncertainty CH4 concentration (parts per billion by volume, ppbv)
Column 5: Published in
1	2	3	4	5
depth	age	ch4	error	published in
(m)	(years BP)	(ppbv)	(ppbv)
1481.17	11067.3	739.3	6.2	Baumgartner et al., (2012)
1481.22	11067.9	741.2	6.2	Baumgartner et al., (2012)
1481.28	11068.5	732.1	6.2	Baumgartner et al., (2012)
1481.33	11069.1	730.3	6.2	Baumgartner et al., (2012)
1481.38	11069.8	737	6.2	Baumgartner et al., (2012)
1482.28	11081	734.2	6.2	Baumgartner et al., (2012)
1483.42	11095.4	739	6.2	Baumgartner et al., (2012)
1484.97	11114.7	738.6	6.2	Baumgartner et al., (2012)
1486.07	11128.3	749.7	6.7	Baumgartner et al., (2012)
1487.17	11142.1	731.9	6.2	Baumgartner et al., (2012)
1488.27	11155.8	735.2	6.2	Baumgartner et al., (2012)
1488.88	11163.4	744.5	6.2	Baumgartner et al., (2012)
1490.47	11183.3	749	6.2	Baumgartner et al., (2012)
1491.08	11190.9	731.1	6.2	Baumgartner et al., (2012)
1493.68	11223.3	756.6	6.2	Baumgartner et al., (2012)
1494.87	11238.2	754.1	6.2	Baumgartner et al., (2012)
1495.97	11251.9	749.9	6.2	Baumgartner et al., (2012)
1496.58	11259.5	740.4	6.2	Baumgartner et al., (2012)
1498.17	11279.4	722	6.2	Baumgartner et al., (2012)
1499.28	11293.2	732.4	6.2	Baumgartner et al., (2012)
1500.38	11306.9	718.7	6.2	Baumgartner et al., (2012)
1500.97	11314.4	693.4	6.2	Baumgartner et al., (2012)
1502.56	11334.1	683.5	6.2	Baumgartner et al., (2012)
1503.17	11342.1	696.1	6.2	Baumgartner et al., (2012)
1504.78	11362.7	707.5	6.2	Baumgartner et al., (2012)
1505.88	11376.9	719.9	6.2	Baumgartner et al., (2012)
1506.97	11391.1	742.2	6.2	Baumgartner et al., (2012)
1507.58	11398.9	741.5	6.2	Baumgartner et al., (2012)
1508.67	11413.1	734.8	6.2	Baumgartner et al., (2012)
1510.28	11433.7	739.8	6.2	Baumgartner et al., (2012)
1510.88	11441.5	746.6	6.2	Baumgartner et al., (2012)
1513.58	11476.3	763.7	6.2	Baumgartner et al., (2012)
1514.67	11490.4	764.7	6.2	Baumgartner et al., (2012)
1515.78	11524.4	735.7	6.2	Baumgartner et al., (2012)
1516.38	11542.8	703.2	6.2	Baumgartner et al., (2012)
1517.97	11591.9	593.4	6.2	Baumgartner et al., (2012)
1519.08	11666.6	526.5	6.2	Baumgartner et al., (2012)
1519.67	11707.3	509.4	6.2	Baumgartner et al., (2012)
1521.28	11765.5	513.9	6.2	Baumgartner et al., (2012)
1521.88	11787.3	513.6	6.2	Baumgartner et al., (2012)
1522.97	11827.3	523.4	6.2	Baumgartner et al., (2012)
1524.58	11885.5	518.2	6.2	Baumgartner et al., (2012)
1525.17	11907.3	511.7	6.2	Baumgartner et al., (2012)
1526.78	11965.5	500.3	6.2	Baumgartner et al., (2012)
1527.88	12005.5	497	6.2	Baumgartner et al., (2012)
1528.47	12027.4	504.6	6.2	Baumgartner et al., (2012)
1529.58	12067.4	509	6.2	Baumgartner et al., (2012)
1530.67	12107.4	508.2	6.2	Baumgartner et al., (2012)
1531.78	12147.4	505.4	6.2	Baumgartner et al., (2012)
1532.88	12187.4	496.1	6.2	Baumgartner et al., (2012)
1535.03	12265.6	506.7	6.2	Baumgartner et al., (2012)
1536.17	12307.4	504.3	6.2	Baumgartner et al., (2012)
1537.83	12367.4	510.6	6.2	Baumgartner et al., (2012)
1539.47	12427.4	507.9	6.2	Baumgartner et al., (2012)
1539.53	12429.3	506.9	7.5	Baumgartner et al., (2012)
1539.58	12431.1	489.7	6.2	Baumgartner et al., (2012)
1539.62	12432.9	501.2	6.2	Baumgartner et al., (2012)
1539.67	12434.7	498.1	6.2	Baumgartner et al., (2012)
1540.08	12449.3	493.3	6.2	Baumgartner et al., (2012)
1542.22	12512.4	498.3	6.2	Baumgartner et al., (2012)
1542.78	12528.5	505.4	6.2	Baumgartner et al., (2012)
1544.42	12577	522.5	6.2	Baumgartner et al., (2012)
1544.97	12593.1	541.3	6.2	Baumgartner et al., (2012)
1547.17	12657.7	569.2	6.2	Baumgartner et al., (2012)
1549.28	12719.4	630.2	6.2	Baumgartner et al., (2012)
1549.33	12720.9	666.9	6.2	Baumgartner et al., (2012)
1549.38	12722.3	630.5	6.2	Baumgartner et al., (2012)
1549.42	12723.8	639.7	6.2	Baumgartner et al., (2012)
1551.03	12770.8	672.3	6.2	Baumgartner et al., (2012)
1553.17	12833.9	705	6.2	Baumgartner et al., (2012)
1553.22	12835.4	709	6.2	Baumgartner et al., (2012)
1554.88	12860.2	692.1	6.2	Baumgartner et al., (2012)
1554.92	12860.9	689.8	6.2	Baumgartner et al., (2012)
1555.74	12873.3	690.9	6.2	Baumgartner et al., (2012)
1555.92	12876	678.1	6.2	Baumgartner et al., (2012)
1557.08	12893.3	673	6.2	Baumgartner et al., (2012)
1558.17	12909.8	667.5	6.2	Baumgartner et al., (2012)
1559.28	12926.4	631.7	6.2	Baumgartner et al., (2012)
1559.33	12927.1	642.7	6.2	Baumgartner et al., (2012)
1560.38	12942.9	646.5	6.2	Baumgartner et al., (2012)
1561.47	12968.1	669.9	6.2	Baumgartner et al., (2012)
1563.08	13004.8	679.2	6.2	Baumgartner et al., (2012)
1563.67	13018.5	683.5	6.2	Baumgartner et al., (2012)
1564.78	13043.7	704.3	6.2	Baumgartner et al., (2012)
1565.88	13068.9	709.6	6.2	Baumgartner et al., (2012)
1567.53	13106.7	703.5	6.2	Baumgartner et al., (2012)
1568.62	13131.9	706.6	6.7	Baumgartner et al., (2012)
1570.28	13169.7	712.8	6.2	Baumgartner et al., (2012)
1570.83	13182.4	701.4	6.2	Baumgartner et al., (2012)
1571.92	13207.5	700.8	6.2	Baumgartner et al., (2012)
1573.03	13232.7	710	6.2	Baumgartner et al., (2012)
1574.12	13257.9	703.3	6.2	Baumgartner et al., (2012)
1575.22	13283.1	705.4	6.2	Baumgartner et al., (2012)
1576.33	13308.3	709.9	6.2	Baumgartner et al., (2012)
1577.42	13333.5	711.2	6.2	Baumgartner et al., (2012)
1579.08	13371.3	677.7	6.2	Baumgartner et al., (2012)
1580.17	13396.5	652.5	6.2	Baumgartner et al., (2012)
1581.28	13417.7	670	6.2	Baumgartner et al., (2012)
1582.38	13438.8	684.3	6.2	Baumgartner et al., (2012)
1583.47	13460	681.3	6.2	Baumgartner et al., (2012)
1584.58	13481.1	690.5	6.2	Baumgartner et al., (2012)
1585.67	13502.3	688.9	6.2	Baumgartner et al., (2012)
1586.78	13523.4	699.4	6.2	Baumgartner et al., (2012)
1587.07	13529	696.2	6.2	Baumgartner et al., (2012)
1588.42	13555.2	704.4	6.2	Baumgartner et al., (2012)
1589.53	13576.3	700.7	6.2	Baumgartner et al., (2012)
1590.62	13597.5	690.9	6.2	Baumgartner et al., (2012)
1591.72	13618.6	681.7	6.2	Baumgartner et al., (2012)
1592.83	13639.8	682.4	6.2	Baumgartner et al., (2012)
1593.92	13660.9	678.5	6.2	Baumgartner et al., (2012)
1595.53	13691.7	663.1	6.2	Baumgartner et al., (2012)
1596.67	13713.8	615	6.2	Baumgartner et al., (2012)
1597.78	13734.9	606.7	6.2	Baumgartner et al., (2012)
1599.42	13770	614.7	7.2	Baumgartner et al., (2012)
1599.92	13780.6	629.1	6.2	Baumgartner et al., (2012)
1601.58	13815.7	666.4	6.2	Baumgartner et al., (2012)
1602.17	13828.4	668	6.2	Baumgartner et al., (2012)
1603.83	13863.5	673.4	6.2	Baumgartner et al., (2012)
1604.92	13886.9	655.4	6.2	Baumgartner et al., (2012)
1606.03	13910.3	651.7	6.2	Baumgartner et al., (2012)
1607.67	13945.3	670	6.2	Baumgartner et al., (2012)
1608.78	13968.7	669.1	6.2	Baumgartner et al., (2012)
1610.42	14003.8	649.6	6.2	Baumgartner et al., (2012)
1612.08	14038.8	672.4	6.2	Baumgartner et al., (2012)
1613.17	14062.2	656.4	6.2	Baumgartner et al., (2012)
1614.28	14085.6	646.5	6.2	Baumgartner et al., (2012)
1615.38	14109	656.1	6.2	Baumgartner et al., (2012)
1617.03	14144	672.6	6.2	Baumgartner et al., (2012)
1618.67	14179.1	657.7	6.2	Baumgartner et al., (2012)
1619.22	14190.8	649	10	Schilt et al., (2010)
1620.28	14213.1	651.1	6.2	Baumgartner et al., (2012)
1621.42	14237.5	649.6	6.2	Baumgartner et al., (2012)
1621.97	14249.2	653	10	Schilt et al., (2010)
1623.62	14284.3	674.6	6.2	Baumgartner et al., (2012)
1623.67	14285.3	673.8	6.2	Baumgartner et al., (2012)
1623.72	14286.4	667.6	6.2	Baumgartner et al., (2012)
1623.78	14287.5	660.5	6.2	Baumgartner et al., (2012)
1623.83	14288.5	668.6	6.2	Baumgartner et al., (2012)
1624.72	14307.6	636.7	10	Schilt et al., (2010)
1626.44	14344.2	648.3	6.2	Baumgartner et al., (2012)
1627.52	14366.9	638	10	Schilt et al., (2010)
1629.12	14429.3	624.6	6.2	Baumgartner et al., (2012)
1630.22	14471.8	582.3	10	Schilt et al., (2010)
1631.33	14495.1	590.5	6.2	Baumgartner et al., (2012)
1632.97	14530.1	522	10	Schilt et al., (2010)
1634.62	14565	536.8	6.2	Baumgartner et al., (2012)
1635.72	14588.3	506.5	15	Schilt et al., (2010)
1637.79	14631.9	503.7	7.8	Baumgartner et al., (2012)
1638.47	14646.5	518.7	10	Schilt et al., (2010)
1639.58	14669.8	516.8	6.2	Baumgartner et al., (2012)
1639.62	14670.9	516.1	6.2	Baumgartner et al., (2012)
1641.22	14704.7	493.7	10	Schilt et al., (2010)
1642.33	14769.9	491.8	6.2	Baumgartner et al., (2012)
1643.42	14835.1	494.9	6.2	Baumgartner et al., (2012)
1643.97	14867.7	489	10	Schilt et al., (2010)
1644.53	14900.3	494.9	6.2	Baumgartner et al., (2012)
1645.62	14965.5	505.4	6.2	Baumgartner et al., (2012)
1646.72	15030.7	502.7	10	Schilt et al., (2010)
1648.38	15128.5	503.9	6.2	Baumgartner et al., (2012)
1649.47	15193.8	493	10	Schilt et al., (2010)
1650.53	15256	503.7	6.2	Baumgartner et al., (2012)
1652.22	15356.8	493.3	10	Schilt et al., (2010)
1653.33	15422	494.3	6.2	Baumgartner et al., (2012)
1654.97	15519.8	477.7	10	Schilt et al., (2010)
1656.08	15585	485.8	6.2	Baumgartner et al., (2012)
1657.72	15682.8	466	10	Schilt et al., (2010)
1659.33	15777.6	486.6	6.2	Baumgartner et al., (2012)
1659.92	15813.2	490.2	6.2	Baumgartner et al., (2012)
1660.47	15845.8	507.7	10	Schilt et al., (2010)
1660.53	15848.7	480	6.2	Baumgartner et al., (2012)
1661.03	15878.4	481.2	6.2	Baumgartner et al., (2012)
1662.67	15976.2	474.3	10	Schilt et al., (2010)
1664.88	16106.6	504.6	6.2	Baumgartner et al., (2012)
1664.92	16109.5	490	6.2	Baumgartner et al., (2012)
1665.97	16171.8	485	10	Schilt et al., (2010)
1667.08	16237	476.6	6.2	Baumgartner et al., (2012)
1668.72	16334.8	459	10	Schilt et al., (2010)
1669.83	16400	479	6.2	Baumgartner et al., (2012)
1670.92	16465.2	468.9	6.2	Baumgartner et al., (2012)
1671.47	16497.8	444.7	10	Schilt et al., (2010)
1672.58	16563	465	6.2	Baumgartner et al., (2012)
1672.67	16568.9	451.9	6.2	Baumgartner et al., (2012)
1674.22	16660.8	491.7	10	Schilt et al., (2010)
1674.52	16678	444.7	6.2	Baumgartner et al., (2012)
1675.33	16726	443.3	6.2	Baumgartner et al., (2012)
1676.42	16791.2	437.3	6.2	Baumgartner et al., (2012)
1676.97	16823.5	429.3	10	Schilt et al., (2010)
1677.53	16856.4	441.4	6.2	Baumgartner et al., (2012)
1679.72	16986.8	439.3	10	Schilt et al., (2010)
1680.83	17052	445.4	6.2	Baumgartner et al., (2012)
1681.92	17117.2	431.3	6.2	Baumgartner et al., (2012)
1682.47	17149.8	424.3	10	Schilt et al., (2010)
1683.03	17182.4	419.9	6.2	Baumgartner et al., (2012)
1683.1	17186.6	422.1	6.2	Baumgartner et al., (2012)
1684.67	17280.2	422.2	6.2	Baumgartner et al., (2012)
1684.72	17283.2	442.1	6.2	Baumgartner et al., (2012)
1685.22	17312.8	424	10	Schilt et al., (2010)
1686.33	17378	443.8	6.2	Baumgartner et al., (2012)
1687.42	17443.2	435.6	6.2	Baumgartner et al., (2012)
1687.97	17475.8	403.7	10	Schilt et al., (2010)
1689.62	17573.6	423.2	6.2	Baumgartner et al., (2012)
1690.72	17638.8	418.3	10	Schilt et al., (2010)
1691.83	17704	411.2	6.2	Baumgartner et al., (2012)
1692.92	17769.2	399	6.2	Baumgartner et al., (2012)
1693.51	17803.6	384	10	Schilt et al., (2010)
1695.12	17864.7	394.8	6.2	Baumgartner et al., (2012)
1696.22	17906.1	393.3	10	Schilt et al., (2010)
1697.33	17947.6	403.5	6.2	Baumgartner et al., (2012)
1698.42	17989	405.2	6.2	Baumgartner et al., (2012)
1698.97	18009.8	393	10	Schilt et al., (2010)
1700.08	18051.2	407.3	6.2	Baumgartner et al., (2012)
1701.77	18114.9	399	10	Schilt et al., (2010)
1702.83	18154.9	403.6	6.2	Baumgartner et al., (2012)
1702.88	18156.8	399.2	6.8	Baumgartner et al., (2012)
1705.53	18256.6	384.6	6.2	Baumgartner et al., (2012)
1706.12	18279.3	397.1	6.2	Baumgartner et al., (2012)
1707.78	18341.4	388.2	6.2	Baumgartner et al., (2012)
1708.88	18382.9	399	6.2	Baumgartner et al., (2012)
1709.97	18424.4	386.6	6.2	Baumgartner et al., (2012)
1711.08	18465.8	405.2	6.2	Baumgartner et al., (2012)
1712.72	18528	390.3	6.2	Baumgartner et al., (2012)
1713.28	18548.7	404.4	6.2	Baumgartner et al., (2012)
1714.38	18590.2	390	6.2	Baumgartner et al., (2012)
1715.47	18631.6	395.7	6.2	Baumgartner et al., (2012)
1716.58	18673.1	397.1	7.1	Baumgartner et al., (2012)
1718.22	18735.3	409.3	6.2	Baumgartner et al., (2012)
1718.78	18756	394.3	6.2	Baumgartner et al., (2012)
1719.88	18797.5	395.1	6.2	Baumgartner et al., (2012)
1720.97	18838.9	397.8	6.2	Baumgartner et al., (2012)
1722.08	18880.4	403.8	6.2	Baumgartner et al., (2012)
1723.12	18920	399.2	6.2	Baumgartner et al., (2012)
1724.28	18963.3	399.8	6.2	Baumgartner et al., (2012)
1725.38	19004.8	413.2	6.2	Baumgartner et al., (2012)
1725.42	19006.7	402.5	6.2	Baumgartner et al., (2012)
1726.47	19046.2	393.5	6.2	Baumgartner et al., (2012)
1727.58	19087.7	389.6	6.2	Baumgartner et al., (2012)
1728.67	19129.2	397	6.2	Baumgartner et al., (2012)
1730.27	19189.1	381	6.2	Baumgartner et al., (2012)
1730.88	19212.1	398.8	6.2	Baumgartner et al., (2012)
1731.97	19253.5	395.9	6.2	Baumgartner et al., (2012)
1733.62	19315.7	406.7	6.2	Baumgartner et al., (2012)
1735.28	19377.9	393.8	6.2	Baumgartner et al., (2012)
1736.38	19419.4	400.2	6.2	Baumgartner et al., (2012)
1737.47	19460.8	396.6	6.2	Baumgartner et al., (2012)
1738.58	19502.3	378.1	6.2	Baumgartner et al., (2012)
1739.67	19543.7	397.1	6.2	Baumgartner et al., (2012)
1740.78	19585.2	391.7	6.2	Baumgartner et al., (2012)
1741.88	19627	392	6.2	Baumgartner et al., (2012)
1743.42	19685.1	391.9	6.2	Baumgartner et al., (2012)
1743.47	19687	399.5	6.2	Baumgartner et al., (2012)
1744.32	19718.6	389.9	6.2	Baumgartner et al., (2012)
1745.17	19751	385.8	6.9	Baumgartner et al., (2012)
1746.83	19813.2	384.9	6.2	Baumgartner et al., (2012)
1747.38	19833.9	399.1	8.2	Baumgartner et al., (2012)
1748.47	19875.4	380.1	6.2	Baumgartner et al., (2012)
1749.58	19916.9	390	6.2	Baumgartner et al., (2012)
1750.67	19958.3	381.7	6.2	Baumgartner et al., (2012)
1751.78	19999.8	410.8	6.2	Baumgartner et al., (2012)
1752.88	20041.2	410.2	6.2	Baumgartner et al., (2012)
1754.47	20101.5	407.2	6.2	Baumgartner et al., (2012)
1755.08	20124.2	384.3	6.2	Baumgartner et al., (2012)
1756.17	20165.6	396.5	6.2	Baumgartner et al., (2012)
1757.28	20207.1	394.2	6.2	Baumgartner et al., (2012)
1758.38	20248.5	398	6.2	Baumgartner et al., (2012)
1759.47	20290	381.5	6.2	Baumgartner et al., (2012)
1761.12	20352.2	377.8	6.2	Baumgartner et al., (2012)
1761.67	20372.9	405.5	6.2	Baumgartner et al., (2012)
1762.78	20414.4	374.8	6.2	Baumgartner et al., (2012)
1763.88	20482.2	399.1	6.2	Baumgartner et al., (2012)
1764.97	20549.9	400	6.2	Baumgartner et al., (2012)
1766.08	20617.7	398	6.2	Baumgartner et al., (2012)
1767.17	20685.5	390.7	6.2	Baumgartner et al., (2012)
1768.83	20787.2	391.4	6.2	Baumgartner et al., (2012)
1769.38	20821.1	404.6	6.2	Baumgartner et al., (2012)
1770.47	20888.9	423.7	6.2	Baumgartner et al., (2012)
1771.58	20925.4	395.1	6.2	Baumgartner et al., (2012)
1772.67	20961.9	409.6	6.2	Baumgartner et al., (2012)
1773.78	20998.4	385.9	6.2	Baumgartner et al., (2012)
1774.88	21034.9	388.2	6.8	Baumgartner et al., (2012)
1775.97	21071.4	404.7	6.2	Baumgartner et al., (2012)
1776.03	21073.1	374.6	6.2	Baumgartner et al., (2012)
1777.08	21108	384.8	6.2	Baumgartner et al., (2012)
1778.17	21144.5	380.4	6.2	Baumgartner et al., (2012)
1779.28	21181	375.6	7.4	Baumgartner et al., (2012)
1780.38	21217.5	375.5	6.2	Baumgartner et al., (2012)
1781.47	21277.1	384.8	6.2	Baumgartner et al., (2012)
1781.53	21279.8	381.3	6.2	Baumgartner et al., (2012)
1781.58	21282.5	379.2	6.2	Baumgartner et al., (2012)
1781.62	21285.2	382.2	6.2	Baumgartner et al., (2012)
1781.67	21287.9	372.2	6.2	Baumgartner et al., (2012)
1782.58	21336.6	365.5	6.2	Baumgartner et al., (2012)
1783.67	21396.1	375.2	6.2	Baumgartner et al., (2012)
1784.78	21455.7	371.3	6.2	Baumgartner et al., (2012)
1786.92	21572.1	375.7	6.2	Baumgartner et al., (2012)
1787.47	21601.8	372.8	6.2	Baumgartner et al., (2012)
1788.62	21664.1	392.1	6.2	Baumgartner et al., (2012)
1788.67	21666.8	389.4	6.2	Baumgartner et al., (2012)
1789.17	21693.9	376.6	6.2	Baumgartner et al., (2012)
1790.28	21753.4	370.1	6.2	Baumgartner et al., (2012)
1791.38	21812.9	377.7	6.2	Baumgartner et al., (2012)
1792.47	21872.5	361.6	6.2	Baumgartner et al., (2012)
1792.53	21875.2	368.9	6.2	Baumgartner et al., (2012)
1794.08	21958.7	394.6	6.2	Baumgartner et al., (2012)
1794.67	21991.1	399.8	6.2	Baumgartner et al., (2012)
1795.78	22050.4	409.3	6.2	Baumgartner et al., (2012)
1795.83	22053.1	414.4	6.2	Baumgartner et al., (2012)
1796.92	22112.4	431.1	6.2	Baumgartner et al., (2012)
1797.97	22147.3	407	6.2	Baumgartner et al., (2012)
1798.03	22148.9	408.4	6.2	Baumgartner et al., (2012)
1799.08	22183.8	422	6.2	Baumgartner et al., (2012)
1800.17	22220.3	406.7	6.2	Baumgartner et al., (2012)
1801.28	22256.8	427.9	7.8	Baumgartner et al., (2012)
1801.33	22258.5	401.3	6.2	Baumgartner et al., (2012)
1802.42	22295	408.3	6.2	Baumgartner et al., (2012)
1803.47	22329.9	431.8	6.2	Baumgartner et al., (2012)
1804.58	22366.4	424.5	6.2	Baumgartner et al., (2012)
1804.62	22368	427.6	6.2	Baumgartner et al., (2012)
1805.12	22384.6	427.3	6.2	Baumgartner et al., (2012)
1806.78	22439.4	426.5	6.2	Baumgartner et al., (2012)
1807.88	22475.9	430.8	6.2	Baumgartner et al., (2012)
1807.92	22477.6	426.2	6.2	Baumgartner et al., (2012)
1807.97	22479.3	430.8	6.2	Baumgartner et al., (2012)
1808.03	22480.9	406.8	6.2	Baumgartner et al., (2012)
1808.08	22482.6	402.2	6.2	Baumgartner et al., (2012)
1808.97	22512.5	405.2	6.2	Baumgartner et al., (2012)
1809.03	22514.1	403.4	6.2	Baumgartner et al., (2012)
1810.08	22549	412.4	6.2	Baumgartner et al., (2012)
1811.67	22602.1	404.2	6.2	Baumgartner et al., (2012)
1812.28	22622	423.3	6.2	Baumgartner et al., (2012)
1813.38	22658.5	428.9	6.2	Baumgartner et al., (2012)
1814.47	22695.1	419.8	6.2	Baumgartner et al., (2012)
1815.08	22715	429.4	6.2	Baumgartner et al., (2012)
1816.67	22768.1	419.6	6.2	Baumgartner et al., (2012)
1817.78	22804.6	410.4	6.2	Baumgartner et al., (2012)
1818.88	22841.1	414.4	6.2	Baumgartner et al., (2012)
1819.97	22877.6	417.6	6.2	Baumgartner et al., (2012)
1821.08	22914.2	423.1	6.2	Baumgartner et al., (2012)
1822.17	22950.7	419.8	6.2	Baumgartner et al., (2012)
1823.83	23005.5	434.3	6.2	Baumgartner et al., (2012)
1824.42	23025.4	420.7	6.2	Baumgartner et al., (2012)
1826.03	23078.5	431.6	6.2	Baumgartner et al., (2012)
1826.58	23096.8	434.4	6.2	Baumgartner et al., (2012)
1828.17	23199	401.8	6.2	Baumgartner et al., (2012)
1828.78	23237.4	405.6	6.2	Baumgartner et al., (2012)
1829.88	23340.7	400.7	6.2	Baumgartner et al., (2012)
1830.97	23443.9	407.9	7.1	Baumgartner et al., (2012)
1832.58	23594.2	404.6	6.2	Baumgartner et al., (2012)
1833.17	23650.5	398.9	6.2	Baumgartner et al., (2012)
1834.28	23753.8	409.6	6.2	Baumgartner et al., (2012)
1834.33	23758.5	412.2	6.2	Baumgartner et al., (2012)
1834.38	23763.2	399.1	6.2	Baumgartner et al., (2012)
1834.42	23767.9	395.4	6.2	Baumgartner et al., (2012)
1834.47	23772.6	405.5	6.2	Baumgartner et al., (2012)
1835.38	23857.1	387.4	6.2	Baumgartner et al., (2012)
1836.47	23960.4	402.4	6.2	Baumgartner et al., (2012)
1837.58	24063.6	401.4	6.2	Baumgartner et al., (2012)
1838.67	24166.9	397.8	6.2	Baumgartner et al., (2012)
1840.33	24321.8	374.9	6.2	Baumgartner et al., (2012)
1840.38	24326.5	390	6.2	Baumgartner et al., (2012)
1840.88	24373.5	410.1	6.2	Baumgartner et al., (2012)
1841.97	24476.8	399.3	6.2	Baumgartner et al., (2012)
1842.53	24528.4	393.4	6.2	Baumgartner et al., (2012)
1844.17	24683.3	396.9	6.2	Baumgartner et al., (2012)
1845.28	24786.6	388.4	6.2	Baumgartner et al., (2012)
1846.88	24936.8	383.2	6.2	Baumgartner et al., (2012)
1847.47	24993.2	393.5	6.2	Baumgartner et al., (2012)
1848.58	25096.5	387.1	6.2	Baumgartner et al., (2012)
1849.67	25199.7	395.5	6.2	Baumgartner et al., (2012)
1850.78	25303	394.5	6.2	Baumgartner et al., (2012)
1852.38	25453.3	383.5	6.2	Baumgartner et al., (2012)
1852.42	25457.9	403.8	6.2	Baumgartner et al., (2012)
1852.47	25462.6	386.8	6.2	Baumgartner et al., (2012)
1854.12	25617.6	373.5	6.2	Baumgartner et al., (2012)
1855.17	25716.2	391	6.2	Baumgartner et al., (2012)
1855.22	25720.8	365.8	6.2	Baumgartner et al., (2012)
1856.28	25819.4	369.6	6.2	Baumgartner et al., (2012)
1857.38	25922.7	399.5	6.2	Baumgartner et al., (2012)
1858.47	26026	392	6.2	Baumgartner et al., (2012)
1859.58	26129.3	387.6	6.2	Baumgartner et al., (2012)
1860.67	26232.6	377.4	6.2	Baumgartner et al., (2012)
1860.78	26242	386	6.2	Baumgartner et al., (2012)
1860.83	26246.6	379.2	6.2	Baumgartner et al., (2012)
1860.88	26251.3	378.2	6.2	Baumgartner et al., (2012)
1861.83	26340.5	374	6.2	Baumgartner et al., (2012)
1862.88	26439.1	383	6.2	Baumgartner et al., (2012)
1863.97	26542.4	383.8	6.2	Baumgartner et al., (2012)
1865.08	26645.7	375.8	6.2	Baumgartner et al., (2012)
1866.17	26749	382.7	6.2	Baumgartner et al., (2012)
1866.72	26800.6	369.7	6.2	Baumgartner et al., (2012)
1867.22	26847.6	366.2	7	Baumgartner et al., (2012)
1868.38	26955.5	418.2	6.2	Baumgartner et al., (2012)
1869.47	26979.1	406.9	6.2	Baumgartner et al., (2012)
1870.03	26990.8	401.1	6.2	Baumgartner et al., (2012)
1871.67	27026.1	415.8	6.2	Baumgartner et al., (2012)
1872.78	27049.6	413.1	6.8	Baumgartner et al., (2012)
1873.88	27073.2	405.6	6.2	Baumgartner et al., (2012)
1874.97	27096.7	406.9	6.2	Baumgartner et al., (2012)
1876.08	27120.2	417.8	6.2	Baumgartner et al., (2012)
1877.22	27144.8	412.3	6.2	Baumgartner et al., (2012)
1878.28	27167.3	400.2	6.2	Baumgartner et al., (2012)
1879.38	27190.8	426.1	6.2	Baumgartner et al., (2012)
1880.47	27214.3	410.4	6.2	Baumgartner et al., (2012)
1880.58	27216.5	396	6.2	Baumgartner et al., (2012)
1880.67	27218.6	405.7	6.2	Baumgartner et al., (2012)
1881.58	27237.8	416.4	7.5	Baumgartner et al., (2012)
1882.67	27261.4	401.6	6.2	Baumgartner et al., (2012)
1883.78	27306.7	407.4	6.2	Baumgartner et al., (2012)
1884.88	27352	444	6.2	Baumgartner et al., (2012)
1884.92	27354.1	417.9	6.2	Baumgartner et al., (2012)
1885.97	27397.4	441.1	6.2	Baumgartner et al., (2012)
1886.03	27399.4	441.3	6.2	Baumgartner et al., (2012)
1887.08	27442.7	447.1	6.2	Baumgartner et al., (2012)
1887.62	27465.4	438.5	6.2	Baumgartner et al., (2012)
1887.84	27474	450.3	9.6	Baumgartner et al., (2012)
1889.33	27535.4	458.6	6.2	Baumgartner et al., (2012)
1890.38	27578.7	466	6.2	Baumgartner et al., (2012)
1890.42	27586.4	452.7	6.2	Baumgartner et al., (2012)
1891.47	27749.4	433.2	6.8	Baumgartner et al., (2012)
1892.58	27920.2	408.8	6.2	Baumgartner et al., (2012)
1893.67	28090.9	398.5	6.2	Baumgartner et al., (2012)
1894.78	28169.2	400.4	6.2	Baumgartner et al., (2012)
1895.88	28247.5	426.8	6.2	Baumgartner et al., (2012)
1896.97	28325.9	429.2	6.2	Baumgartner et al., (2012)
1897.53	28365	418.6	6.2	Baumgartner et al., (2012)
1899.17	28482.5	434.4	6.2	Baumgartner et al., (2012)
1900.28	28560.8	433	6.2	Baumgartner et al., (2012)
1901.38	28583.7	462.9	8	Baumgartner et al., (2012)
1901.42	28584.7	451.3	6.2	Baumgartner et al., (2012)
1902.47	28606.6	452.1	6.2	Baumgartner et al., (2012)
1903.58	28629.5	470.4	6.2	Baumgartner et al., (2012)
1904.67	28652.3	482.3	6.2	Baumgartner et al., (2012)
1906.88	28698.1	520.9	6.2	Baumgartner et al., (2012)
1906.92	28699.1	507.2	6.2	Baumgartner et al., (2012)
1907.97	28731.5	512.3	6.2	Baumgartner et al., (2012)
1908.03	28733.1	482	6.2	Baumgartner et al., (2012)
1909.08	28765.5	505.3	6.2	Baumgartner et al., (2012)
1910.17	28799.5	517.9	6.2	Baumgartner et al., (2012)
1911.28	28833.4	505.7	6.2	Baumgartner et al., (2012)
1912.92	28920.7	456.1	6.2	Baumgartner et al., (2012)
1913.47	28949.7	441.2	6.2	Baumgartner et al., (2012)
1914.58	29007.9	427.4	6.2	Baumgartner et al., (2012)
1915.67	29066	426.3	6.2	Baumgartner et al., (2012)
1916.78	29124.2	434.5	6.2	Baumgartner et al., (2012)
1916.83	29126.8	401.6	6.2	Baumgartner et al., (2012)
1917.88	29182.3	400.7	6.2	Baumgartner et al., (2012)
1917.92	29185	395.6	6.2	Baumgartner et al., (2012)
1917.97	29187.6	403.9	6.2	Baumgartner et al., (2012)
1918.03	29190.3	393.3	6.2	Baumgartner et al., (2012)
1918.08	29192.9	391.9	6.2	Baumgartner et al., (2012)
1918.97	29240.5	391.8	6.2	Baumgartner et al., (2012)
1920.08	29287	404.6	6.2	Baumgartner et al., (2012)
1921.17	29333.5	407.4	6.2	Baumgartner et al., (2012)
1922.28	29380.1	421.1	6.2	Baumgartner et al., (2012)
1923.38	29426.6	414.9	6.2	Baumgartner et al., (2012)
1925.03	29496.4	417.8	6.2	Baumgartner et al., (2012)
1926.67	29566.2	443.8	6.2	Baumgartner et al., (2012)
1926.72	29568.3	409.4	6.2	Baumgartner et al., (2012)
1927.78	29612.7	421.6	6.2	Baumgartner et al., (2012)
1929.42	29682.5	417.5	6.2	Baumgartner et al., (2012)
1930.53	29729	419	6.2	Baumgartner et al., (2012)
1932.67	29820	415.7	6.2	Baumgartner et al., (2012)
1933.83	29868.6	422.7	6.2	Baumgartner et al., (2012)
1934.92	29915.2	409	6.2	Baumgartner et al., (2012)
1935.47	29938.4	421.9	6.2	Baumgartner et al., (2012)
1935.53	29940.5	431.5	6.2	Baumgartner et al., (2012)
1936.58	29984.9	441.7	6.2	Baumgartner et al., (2012)
1937.67	30031.5	444	6.2	Baumgartner et al., (2012)
1937.72	30036.6	427.9	6.2	Baumgartner et al., (2012)
1938.78	30144.5	433.5	6.2	Baumgartner et al., (2012)
1938.83	30149.6	438.5	6.2	Baumgartner et al., (2012)
1939.37	30205.1	428.8	6.2	Baumgartner et al., (2012)
1940.97	30370.5	448.8	6.2	Baumgartner et al., (2012)
1941.03	30375.6	422	6.2	Baumgartner et al., (2012)
1942.08	30483.5	416.5	6.2	Baumgartner et al., (2012)
1942.12	30488.6	435.5	6.2	Baumgartner et al., (2012)
1943.28	30606.7	424.4	6.2	Baumgartner et al., (2012)
1943.72	30653	421.4	6.2	Baumgartner et al., (2012)
1944.28	30709.5	413.9	6.2	Baumgartner et al., (2012)
1944.83	30766	407.4	6.2	Baumgartner et al., (2012)
1944.88	30771.1	397.6	6.2	Baumgartner et al., (2012)
1944.92	30775	402.3	6.2	Baumgartner et al., (2012)
1944.97	30778.9	405.2	6.2	Baumgartner et al., (2012)
1945.03	30782.8	407.9	6.2	Baumgartner et al., (2012)
1945.38	30809.9	420.3	6.2	Baumgartner et al., (2012)
1945.92	30852.7	404.2	6.2	Baumgartner et al., (2012)
1946.47	30895.4	412.3	6.2	Baumgartner et al., (2012)
1947.03	30938.1	415.4	6.2	Baumgartner et al., (2012)
1947.58	30980.8	422.7	6.2	Baumgartner et al., (2012)
1948.12	31023.5	407.5	6.2	Baumgartner et al., (2012)
1948.67	31066.2	414	6.2	Baumgartner et al., (2012)
1949.22	31108.9	413	6.2	Baumgartner et al., (2012)
1950.33	31194.4	427.7	6.2	Baumgartner et al., (2012)
1950.88	31237.1	424.5	6.9	Baumgartner et al., (2012)
1952.53	31365.2	453.7	6.2	Baumgartner et al., (2012)
1954.17	31493.4	475.4	6.2	Baumgartner et al., (2012)
1954.72	31536.1	503.2	6.2	Baumgartner et al., (2012)
1956.38	31664.2	473.7	6.2	Baumgartner et al., (2012)
1957.47	31749.6	492.1	6.2	Baumgartner et al., (2012)
1958.58	31835.1	496.8	6.2	Baumgartner et al., (2012)
1959.72	31924.4	521.1	6.2	Baumgartner et al., (2012)
